# Supplementary material for: Vitamin D Status and Risk of All-Cause and Cause-Specific Mortality in Osteoarthritis Patients: Results from NHANES III and NHANES 2001–2018
Source: MDPI journal article supplement (doi:10.3390/nu14214629), 2022-11-03
Supplement: s1 [file s1]

**Table S1 HR (95% CIs) for all-cause and cause-specific mortality according to serum 25(OH)D concentrations  
among OA patients after excluding participants with history of cancers (n=3,640)**

|                        | Serum 25(OH)D concentrations (nmol/L) |                   |                   |                   | Per one-unit increment in<br>natural log-transformed 25(OH)D |
|------------------------|---------------------------------------|-------------------|-------------------|-------------------|--------------------------------------------------------------|
|                        | <25.0                                 | 25.0-49.9         | 50.0-74.9         | ≥75.0             |                                                              |
| All-cause mortality    |                                       |                   |                   |                   |                                                              |
| Number of deaths/total | 49/121                                | 320/876           | 371/1,280         | 263/1,363         |                                                              |
| Model 1 <sup>a</sup>   | Ref.                                  | 0.41 (0.25, 0.68) | 0.37 (0.22, 0.61) | 0.31 (0.18, 0.54) | 0.65 (0.50, 0.85)                                            |
| Model 2 <sup>b</sup>   | Ref.                                  | 0.44 (0.27, 0.71) | 0.42 (0.26, 0.69) | 0.38 (0.22, 0.65) | 0.77 (0.59, 1.00)                                            |
| Model 3 <sup>c</sup>   | Ref.                                  | 0.47 (0.28, 0.77) | 0.48 (0.30, 0.78) | 0.43 (0.25, 0.74) | 0.84 (0.64, 1.10)                                            |
| CVD mortality          |                                       |                   |                   |                   |                                                              |
| Number of deaths       | 18                                    | 103               | 110               | 84                |                                                              |
| Model 1 <sup>a</sup>   | Ref.                                  | 0.27 (0.11, 0.62) | 0.21 (0.09, 0.49) | 0.19 (0.08, 0.46) | 0.51 (0.29, 0.88)                                            |
| Model 2 <sup>b</sup>   | Ref.                                  | 0.27 (0.13, 0.58) | 0.24 (0.11, 0.52) | 0.24 (0.10, 0.56) | 0.64 (0.37, 1.13)                                            |
| Model 3 <sup>c</sup>   | Ref.                                  | 0.27 (0.12, 0.61) | 0.26 (0.12, 0.57) | 0.25 (0.11, 0.55) | 0.66 (0.40, 1.10)                                            |
| Cancer mortality       |                                       |                   |                   |                   |                                                              |
| Number of deaths       | 7                                     | 46                | 70                | 56                |                                                              |
| Model 1 <sup>a</sup>   | Ref.                                  | 0.45 (0.17, 1.21) | 0.50 (0.19, 1.28) | 0.49 (0.18, 1.32) | 0.86 (0.55, 1.36)                                            |
| Model 2 <sup>b</sup>   | Ref.                                  | 0.49 (0.18, 1.32) | 0.62 (0.24, 1.61) | 0.65 (0.24, 1.75) | 1.03 (0.65, 1.63)                                            |
| Model 3 <sup>c</sup>   | Ref.                                  | 0.51 (0.18, 1.45) | 0.65 (0.24, 1.78) | 0.68 (0.24, 1.93) | 1.04 (0.67, 1.64)                                            |
| Other mortality        |                                       |                   |                   |                   |                                                              |
| Number of deaths       | 24                                    | 171               | 191               | 123               |                                                              |
| Model 1 <sup>a</sup>   | Ref.                                  | 0.56 (0.30, 1.04) | 0.50 (0.28, 0.89) | 0.38 (0.20, 0.72) | 0.69 (0.50, 0.95)                                            |
| Model 2 <sup>b</sup>   | Ref.                                  | 0.57 (0.30, 1.08) | 0.53 (0.29, 0.97) | 0.44 (0.22, 0.85) | 0.78 (0.56, 1.09)                                            |
| Model 3 <sup>c</sup>   | Ref.                                  | 0.70 (0.33, 1.45) | 0.70 (0.35, 1.41) | 0.58 (0.27, 1.26) | 0.92 (0.64, 1.33)                                            |

NHANES, National Health and Nutrition Examination Survey; 25(OH)D, 25-Hydroxyvitamin D; OA, osteoarthritis; RA, rheumatoid arthritis; CVD, cardiovascular disease; HR, hazard ratio; CI, confidence interval; Ref., reference.

<sup>a</sup> Model 1 adjusted for age, gender, and race/ethnicity; <sup>b</sup> Model 2 further adjusted (from Model 1) for education, body mass index, family poverty income ratio, physical activity, smoking status, and drinking status; <sup>c</sup> Model 3 further adjusted (from Model 2) for diabetes mellitus, hypertension, cardiovascular disease, cancer, chronic lung disease, and renal disease

**Table S2 HR (95% CIs) for all-cause and cause-specific mortality according to serum 25(OH)D concentrations among OA patients after excluding participants with history of CVD (n=3,636)**

|                        | Serum 25(OH)D concentrations (nmol/L) |                   |                   |                   | Per one-unit increment in<br>natural log-transformed 25(OH)D |
|------------------------|---------------------------------------|-------------------|-------------------|-------------------|--------------------------------------------------------------|
|                        | <25.0                                 | 25.0-49.9         | 50.0-74.9         | ≥75.0             |                                                              |
| All-cause mortality    |                                       |                   |                   |                   |                                                              |
| Number of deaths/total | 47/107                                | 309/828           | 368/1,286         | 264/1,415         |                                                              |
| Model 1 <sup>a</sup>   | Ref.                                  | 0.30 (0.18, 0.51) | 0.26 (0.15, 0.44) | 0.25 (0.14, 0.46) | 0.67 (0.51, 0.90)                                            |
| Model 2 <sup>b</sup>   | Ref.                                  | 0.33 (0.21, 0.52) | 0.29 (0.18, 0.46) | 0.30 (0.17, 0.53) | 0.77 (0.58, 1.02)                                            |
| Model 3 <sup>c</sup>   | Ref.                                  | 0.35 (0.22, 0.56) | 0.33 (0.21, 0.52) | 0.34 (0.20, 0.58) | 0.81 (0.62, 1.07)                                            |
| CVD mortality          |                                       |                   |                   |                   |                                                              |
| Number of deaths       | 16                                    | 88                | 99                | 66                |                                                              |
| Model 1 <sup>a</sup>   | Ref.                                  | 0.17 (0.07, 0.42) | 0.11 (0.05, 0.28) | 0.12 (0.05, 0.33) | 0.41 (0.23, 0.71)                                            |
| Model 2 <sup>b</sup>   | Ref.                                  | 0.17 (0.07, 0.41) | 0.13 (0.06, 0.30) | 0.17 (0.06, 0.45) | 0.52 (0.28, 0.99)                                            |
| Model 3 <sup>c</sup>   | Ref.                                  | 0.18 (0.08, 0.42) | 0.15 (0.07, 0.32) | 0.18 (0.07, 0.44) | 0.54 (0.29, 0.99)                                            |
| Cancer mortality       |                                       |                   |                   |                   |                                                              |
| Number of deaths       | 8                                     | 56                | 78                | 68                |                                                              |
| Model 1 <sup>a</sup>   | Ref.                                  | 0.44 (0.18, 1.08) | 0.41 (0.16, 1.02) | 0.46 (0.18, 1.15) | 0.82 (0.51, 1.31)                                            |
| Model 2 <sup>b</sup>   | Ref.                                  | 0.48 (0.20, 1.19) | 0.47 (0.19, 1.15) | 0.56 (0.23, 1.35) | 0.94 (0.61, 1.44)                                            |
| Model 3 <sup>c</sup>   | Ref.                                  | 0.48 (0.18, 1.23) | 0.47 (0.18, 1.19) | 0.55 (0.21, 1.39) | 0.91 (0.60, 1.39)                                            |
| Other mortality        |                                       |                   |                   |                   |                                                              |
| Number of deaths       | 23                                    | 165               | 191               | 130               |                                                              |
| Model 1 <sup>a</sup>   | Ref.                                  | 0.42 (0.22, 0.80) | 0.38 (0.21, 0.69) | 0.34 (0.19, 0.61) | 0.81 (0.60, 1.10)                                            |
| Model 2 <sup>b</sup>   | Ref.                                  | 0.44 (0.24, 0.81) | 0.39 (0.23, 0.68) | 0.38 (0.21, 0.67) | 0.88 (0.66, 1.18)                                            |
| Model 3 <sup>c</sup>   | Ref.                                  | 0.52 (0.27, 0.98) | 0.50 (0.28, 0.87) | 0.47 (0.26, 0.85) | 0.98 (0.74, 1.30)                                            |

NHANES, National Health and Nutrition Examination Survey; 25(OH)D, 25-Hydroxyvitamin D; OA, osteoarthritis; CVD, cardiovascular disease; HR, hazard ratio; CI, confidence interval; Ref., reference.

<sup>a</sup> Model 1 adjusted for age, gender, and race/ethnicity; <sup>b</sup> Model 2 further adjusted (from Model 1) for education, body mass index, family poverty income ratio, physical activity, smoking status, and drinking status; <sup>c</sup> Model 3 further adjusted (from Model 2) for diabetes mellitus, hypertension, cardiovascular disease, cancer, chronic lung disease, and renal disease.

**Table S3 HR (95% CIs) for all-cause and cause-specific mortality according to serum 25(OH)D concentrations among OA patients after excluding participants who died within two years of follow-up (n=4,388)**

|                        | Serum 25(OH)D concentrations (nmol/L) |                   |                   |                   | Per one-unit increment in<br>natural log-transformed 25(OH)D |
|------------------------|---------------------------------------|-------------------|-------------------|-------------------|--------------------------------------------------------------|
|                        | <25.0                                 | 25.0-49.9         | 50.0-74.9         | ≥75.0             |                                                              |
| All-cause mortality    |                                       |                   |                   |                   |                                                              |
| Number of deaths/total | 48/126                                | 370/995           | 453/1,522         | 335/1,745         |                                                              |
| Model 1 <sup>a</sup>   | Ref.                                  | 0.50 (0.32, 0.78) | 0.43 (0.27, 0.67) | 0.40 (0.25, 0.63) | 0.73 (0.58, 0.91)                                            |
| Model 2 <sup>b</sup>   | Ref.                                  | 0.52 (0.33, 0.81) | 0.47 (0.30, 0.73) | 0.47 (0.29, 0.74) | 0.84 (0.67, 1.05)                                            |
| Model 3 <sup>c</sup>   | Ref.                                  | 0.53 (0.34, 0.83) | 0.51 (0.33, 0.78) | 0.51 (0.33, 0.79) | 0.90 (0.73, 1.11)                                            |
| CVD mortality          |                                       |                   |                   |                   |                                                              |
| Number of deaths       | 16                                    | 119               | 142               | 93                |                                                              |
| Model 1 <sup>a</sup>   | Ref.                                  | 0.43 (0.19, 0.98) | 0.32 (0.15, 0.71) | 0.28 (0.12, 0.64) | 0.55 (0.35, 0.86)                                            |
| Model 2 <sup>b</sup>   | Ref.                                  | 0.41 (0.18, 0.95) | 0.36 (0.16, 0.79) | 0.34 (0.15, 0.77) | 0.71 (0.45, 0.12)                                            |
| Model 3 <sup>c</sup>   | Ref.                                  | 0.46 (0.20, 1.04) | 0.41 (0.19, 0.92) | 0.39 (0.18, 0.86) | 0.75 (0.49, 1.15)                                            |
| Cancer mortality       |                                       |                   |                   |                   |                                                              |
| Number of deaths       | 6                                     | 61                | 82                | 77                |                                                              |
| Model 1 <sup>a</sup>   | Ref.                                  | 0.68 (0.24, 1.91) | 0.54 (0.19, 1.53) | 0.72 (0.25, 2.03) | 0.97 (0.60, 1.55)                                            |
| Model 2 <sup>b</sup>   | Ref.                                  | 0.73 (0.25, 2.07) | 0.64 (0.22, 1.87) | 0.88 (0.31, 2.51) | 1.13 (0.73, 1.75)                                            |
| Model 3 <sup>c</sup>   | Ref.                                  | 0.67 (0.23, 1.98) | 0.61 (0.20, 1.82) | 0.84 (0.29, 2.46) | 1.14 (0.74, 1.76)                                            |
| Other mortality        |                                       |                   |                   |                   |                                                              |
| Number of deaths       | 26                                    | 190               | 229               | 165               |                                                              |
| Model 1 <sup>a</sup>   | Ref.                                  | 0.49 (0.28, 0.88) | 0.46 (0.27, 0.78) | 0.39 (0.22, 0.68) | 0.76 (0.57, 1.01)                                            |
| Model 2 <sup>b</sup>   | Ref.                                  | 0.51 (0.29, 0.91) | 0.48 (0.28, 0.80) | 0.45 (0.25, 0.79) | 0.85 (0.64, 1.15)                                            |
| Model 3 <sup>c</sup>   | Ref.                                  | 0.55 (0.31, 0.97) | 0.54 (0.33, 0.90) | 0.51 (0.29, 0.88) | 0.94 (0.71, 1.26)                                            |

NHANES, National Health and Nutrition Examination Survey; 25(OH)D, 25-Hydroxyvitamin D; OA, osteoarthritis; RA, rheumatoid arthritis; CVD, cardiovascular disease; HR, hazard ratio; CI, confidence interval; Ref., reference.

<sup>a</sup> Model 1 adjusted for age, gender, and race/ethnicity; <sup>b</sup> Model 2 further adjusted (from Model 1) for education, body mass index, family poverty income ratio, physical activity, smoking status, and drinking status; <sup>c</sup> Model 3 further adjusted (from Model 2) for diabetes mellitus, hypertension, cardiovascular disease, cancer, chronic lung disease, and renal disease.

**Table S4 HR (95% CIs) for all-cause and cause-specific mortality according to serum 25(OH)D concentrations among OA patients with further adjustment of fracture, lipid profiles, CRP, or lead**

|                                       |      | Serum 25(OH)D concentrations (nmol/L) |                   |                   |                   | Per one-unit increment in<br>natural log-transformed 25(OH)D |
|---------------------------------------|------|---------------------------------------|-------------------|-------------------|-------------------|--------------------------------------------------------------|
|                                       |      | <25.0                                 | 25.0-49.9         | 50.0-74.9         | ≥75.0             |                                                              |
| All-cause mortality                   |      |                                       |                   |                   |                   |                                                              |
| Model 3 + Fracture <sup>a</sup>       | Ref. | 0.57 (0.36, 0.89)                     | 0.54 (0.35, 0.85) | 0.50 (0.31, 0.81) | 0.82 (0.69, 0.99) |                                                              |
| Model 3 + lipid profiles <sup>b</sup> | Ref. | 0.49 (0.31, 0.76)                     | 0.44 (0.29, 0.68) | 0.43 (0.26, 0.70) | 0.80 (0.65, 1.00) |                                                              |
| Model 3 + CRP <sup>c</sup>            | Ref. | 0.44 (0.28, 0.68)                     | 0.41 (0.26, 0.62) | 0.39 (0.23, 0.66) | 0.81 (0.63, 1.06) |                                                              |
| Model 3 + lead <sup>d</sup>           | Ref. | 0.48 (0.31, 0.77)                     | 0.44 (0.29, 0.69) | 0.45 (0.27, 0.75) | 0.82 (0.65, 1.05) |                                                              |
| CVD mortality                         |      |                                       |                   |                   |                   |                                                              |
| Model 3 + Fracture <sup>a</sup>       | Ref. | 0.55 (0.25, 1.21)                     | 0.48 (0.23, 1.02) | 0.42 (0.18, 0.99) | 0.71 (0.47, 1.08) |                                                              |
| Model 3 + lipid profiles <sup>b</sup> | Ref. | 0.28 (0.13, 0.60)                     | 0.25 (0.12, 0.52) | 0.24 (0.11, 0.51) | 0.62 (0.40, 0.98) |                                                              |
| Model 3 + CRP <sup>c</sup>            | Ref. | 0.26 (0.12, 0.55)                     | 0.21 (0.10, 0.43) | 0.21 (0.09, 0.48) | 0.48 (0.34, 0.98) |                                                              |
| Model 3 + lead <sup>d</sup>           | Ref. | 0.31 (0.14, 0.69)                     | 0.27 (0.12, 0.60) | 0.28 (0.12, 0.63) | 0.65 (0.42, 1.02) |                                                              |
| Cancer mortality                      |      |                                       |                   |                   |                   |                                                              |
| Model 3 + Fracture <sup>a</sup>       | Ref. | 0.75 (0.30, 1.90)                     | 0.73 (0.29, 1.85) | 0.77 (0.29, 2.00) | 0.89 (0.64, 1.25) |                                                              |
| Model 3 + lipid profiles <sup>b</sup> | Ref. | 0.74 (0.29, 1.88)                     | 0.67 (0.25, 1.75) | 0.81 (0.32, 2.06) | 1.01 (0.71, 1.45) |                                                              |
| Model 3 + CRP <sup>c</sup>            | Ref. | 0.69 (0.26, 1.77)                     | 0.64 (0.24, 1.73) | 0.66 (0.25, 1.75) | 0.89 (0.58, 1.36) |                                                              |
| Model 3 + lead <sup>d</sup>           | Ref. | 0.70 (0.27, 1.76)                     | 0.65 (0.25, 1.68) | 0.76 (0.31, 1.90) | 1.00 (0.69, 1.44) |                                                              |
| Other mortality                       |      |                                       |                   |                   |                   |                                                              |
| Model 3 + Fracture <sup>a</sup>       | Ref. | 0.50 (0.28, 0.89)                     | 0.52 (0.31, 0.88) | 0.49 (0.28, 0.85) | 0.92 (0.74, 1.15) |                                                              |
| Model 3 + lipid profiles <sup>b</sup> | Ref. | 0.64 (0.36, 1.14)                     | 0.60 (0.36, 1.00) | 0.55 (0.31, 0.97) | 0.88 (0.67, 1.14) |                                                              |
| Model 3 + CRP <sup>c</sup>            | Ref. | 0.53 (0.30, 0.93)                     | 0.54 (0.32, 0.89) | 0.52 (0.29, 0.92) | 0.97 (0.71, 1.32) |                                                              |
| Model 3 + lead <sup>d</sup>           | Ref. | 0.60 (0.34, 1.04)                     | 0.56 (0.34, 0.92) | 0.56 (0.33, 0.95) | 0.92 (0.70, 1.22) |                                                              |

NHANES, National Health and Nutrition Examination Survey; 25(OH)D, 25-Hydroxyvitamin D; OA, osteoarthritis; CVD, cardiovascular disease; CRP, C-reactive protein; HR, hazard ratio; CI, confidence interval; Ref., reference.

<sup>a</sup> Model further adjusted (from Model 3) for history of fracture, and 1090 subjects were lost due to missing related data; <sup>b</sup> Model further adjusted (from Model 3) for lipid profiles (i.e., the ratio of total cholesterol to HDL), and 45 subjects were lost due to missing related data; <sup>c</sup> Model further adjusted (from Model 3) for CRP, and 1,130 subjects were lost due to missing related data; <sup>d</sup> Model further adjusted (from Model 3) for lead, and 547 subjects were lost due to missing related data.
